# Supplementary material for: Integrating biodiversity: a longitudinal and cross-sectoral analysis of Swiss politics
Source: Springer Nature journal article supplement (doi:10.1007/s11077-022-09456-4), 2022-04-04
Supplement: MOESM1 [file 20283878]

## Online Appendix A1: List of document sources

List of sources of documents in the corpus.

| Document type                                                                                                                                                                                                                         | Source                                      | URL                                                                                                                                                                                                       |
|---------------------------------------------------------------------------------------------------------------------------------------------------------------------------------------------------------------------------------------|---------------------------------------------|-----------------------------------------------------------------------------------------------------------------------------------------------------------------------------------------------------------|
| <ul style="list-style-type: none"><li>- Businesses</li><li>- Responses to businesses</li><li>- Transcripts</li></ul>                                                                                                                  | Web services of the Swiss Parliament        | <a href="https://www.parlament.ch/en/services/open-data-webservices">https://www.parlament.ch/en/services/open-data-webservices</a>                                                                       |
| <ul style="list-style-type: none"><li>- Constitution</li><li>- Laws</li><li>- Ordinances</li><li>- Treaties</li></ul>                                                                                                                 | Official Compilation of Federal Legislation | <a href="https://opendata.swiss/en/dataset/official-compilation-of-federal-legislation-bs-as-1947-2018">https://opendata.swiss/en/dataset/official-compilation-of-federal-legislation-bs-as-1947-2018</a> |
| <ul style="list-style-type: none"><li>- (Simple) Federal decrees</li><li>- Federal council decrees</li><li>- General decrees</li><li>- Strategies, action plans</li><li>- Reports</li><li>- Dispatches</li><li>- Draft laws</li></ul> | Federal Gazette                             | <a href="https://www.fedlex.admin.ch/de/fga/index">https://www.fedlex.admin.ch/de/fga/index</a>                                                                                                           |
| <ul style="list-style-type: none"><li>- Decisions</li></ul>                                                                                                                                                                           | Platform entscheidsuche.ch                  | <a href="https://www.entscheidsuche.ch/">https://www.entscheidsuche.ch/</a>                                                                                                                               |

## Online Appendix A2: List of policy sectors

List of policy sectors, including accuracy measures (based on 10-fold cross-validation) and number of documents classified.

| Policy sector                          | F1 <sub>G</sub> | F1 <sub>F</sub> | F1 <sub>I</sub> | N       |
|----------------------------------------|-----------------|-----------------|-----------------|---------|
| Agriculture                            | 0.64            | 0.71            | 0.72            | 7,883   |
| Culture, religion                      | 0.63            | 0.70            | 0.73            | 978     |
| Economy                                | 0.67            | 0.71            | 0.71            | 29,764  |
| Education                              | 0.81            | 0.81            | 0.85            | 3,616   |
| Energy                                 | 0.75            | 0.77            | 0.81            | 9,514   |
| Environment                            | 0.84            | 0.81            | 0.86            | 7,349   |
| Finance                                | 0.76            | 0.76            | 0.81            | 37,155  |
| Health                                 | 0.84            | 0.82            | 0.87            | 34,263  |
| International politics, foreign policy | 0.68            | 0.73            | 0.76            | 10,874  |
| Media, communication                   | 0.70            | 0.77            | 0.77            | 6,626   |
| Parliament                             | 0.69            | 0.72            | 0.72            | 1,885   |
| Policy on Europe                       | 0.57            | 0.69            | 0.67            | 631     |
| Policy on immigration and asylum       | 0.78            | 0.79            | 0.84            | 52,694  |
| Political context                      | 0.75            | 0.74            | 0.78            | 23,148  |
| Right/law                              | 0.82            | 0.81            | 0.86            | 109,002 |
| Science, research                      | 0.68            | 0.71            | 0.72            | 462     |
| Security policy                        | 0.84            | 0.83            | 0.88            | 14,721  |
| Social affairs                         | 0.70            | 0.75            | 0.74            | 39,756  |
| Spatial development, housing           | 0.64            | 0.70            | 0.76            | 1,280   |
| Transport                              | 0.82            | 0.82            | 0.84            | 20,343  |
| Not identifiable                       | -               | -               | -               | 28,040  |

## Online Appendix A3: Coding guidelines

All statements that have a biodiversity link are coded as relevant. Links can also be indirect or implicit. The following guidelines help to draw the line. They were developed in several iterations in which three of the authors independently coded the same statements and then compared and discussed them to achieve consensus.

### Relevant/included

- Both positive (protecting biodiversity) and negative references (endangered biodiversity)
- **Habitat protection** when focus on biological aspects, e.g. "wertvolle Waldgebiete", "Luftschadstoffe wirken sich schädlich auf empfindliche Ökosysteme aus"
- **Species protection**, including statements about managing costs/implications, e.g. "Schutz des Wolfes", "die Unterzeichnende wollen das Projekt zur Wiederansiedlung des Luchses beenden", "präventiv würden in diesen Kantonen Grossraubtiere abgeknallt"
- Mentions of **instruments** and **measures** aiming at the protection/promotion of biodiversity, e.g. "ökologischer Leistungsnachweis", "Berner Konvention", "Bundesinventar der Moorlandschaften"
- Statements about the **number/presence of species** and their **(genetic) characteristics**, e.g. "Freisetzungsversuche von gentechnisch veränderten Organismen", "gentechnisch veränderte vermehrungsfähige Pflanzen", "im Herbst 2011 erstmals einzelne Laubholzbockkäfer nachgewiesen", "Es wird angenommen, dass es sich bei 11 Prozent der Pflanzen in der Schweiz um Neophyten handelt.", "Ein Anspruch auf eine finanzielle Entschädigung durch die öffentliche Hand besteht nur dann, wenn die Schäden nachweislich auf die Präsenz von Grossraubtieren zurückgehen."

### Not relevant/not included

- **Animal welfare** and **farm animals**, e.g. "Würde des Tieres", "Der Tierbestand muss regelmässig von einer Tierärztin oder einem Tierarzt überwacht werden."
- Statements with **main focus on people/society**, specifically:
  - **Individuals**, e.g. "sichtbehindernden Vegetation auf seinem Grundstück"
  - **People's health**, e.g. "allergenen Ambrosia-Pollen"
  - **Economy**, e.g. "Naturpärke erhalten Lebensgrundlage der Bevölkerung", "Revitalisierungsprogramm für die Schweizer Wirtschaft"
  - **Agriculture**, e.g. "Gemeinschaftsweiden gehörten zur Sömmerungsfläche von Gemeinschaftsbetrieben", "Das Gesetz soll den gleichzeitigen Anbau von GVO und herkömmlichen Nutzpflanzen in der Landwirtschaft (Koexistenz) regeln"
- Purely **technical** or **procedural aspects**, e.g. "Die Kantone können im Einzelfall den Gewässerraum autonom festlegen"

## Online Appendix A4: Biodiversity dictionary

List without \b before and after terms for better readability (word boundary).

**German:** ([a-z])\*biodiversität([a-z])\* , ([a-z])\*gehölz([a-z])\* , ([a-z])\*habitat([a-z])\* , ([a-z])\*käfer(s|en)? , ([a-z])\*nutzungsintensität([a-z])\* , ([a-z])\*renaturierung([a-z])\* , ([a-z])\*revitalisier([a-z])\* , ([a-z])\*schutzgebiet(e|s|es|en)? , ([a-z])\*seggenried([a-z])\* , ([a-z])\*vogelkollision(en)? , ([a-z])\*vogelschutz([a-z])\* , (aus|massen)sterben([a-z])\* , (bach|see)forelle(n)? , (baum|pflanzen|insekten|fisch)art(en)? , (genetisch([a-z])\*|gentechnisch([a-z])\* verändert(e|er|en)? organis(mus|men)? , (honig|wild)?biene(n)? , (pflanzen|tier)welt , (ufer|auen)vegetation(en)? , (wald|natur|schutz)reservat(es|s|e|en)? , abholz([a-z])\* , agrarumweltindikator(s|en)? , all-ema , altholz([a-z])\* , ambrosia , amphibi(e|en)? , arten und lebensräume landwirtschaft , artendiversität , artenförderung(en)? , artenreich(tum(s)?)? , artenschutz([a-z])\* , artenschwund(s|es)? , artensterben(s)? , artenverlust(s|es|e|en)? , artenvielfalt , artenzusammensetzung(en)? , asthaufen(s)? , auen(landschaft(en)?|gebiet(e|en|es|s)?|w(a|ä)ld(er|es|s)?) , aufforst(en|ung(en)?) , aui , bdb , bdm , berner konvention , besatzmassnahm([a-z])\* , bestäub([a-z])\* , bff-typ(s|en)? , biber(s)? , biologisch([a-z])\* diversität , biologisch([a-z])\* vielfalt , biotop([a-z])\* , bodenbedeckung([a-z])\* , bodenfruchtbarkeit , braunbär(s|en)? , brutv(o|ö)gel(s|en)? , convention on biological diversity , endemi([a-z])\* , faun(a|en)? , feldhase(n)? , fischgängigkeit , fischsterben(s)? , fischterrasse(n)? , fischwanderung(en)? , flachmoor([a-z])\* , flachwasser([a-z])\* , flederm(a|ä)us(e|en)? , flora(s)? , flussaufweitung(en) , flusslandschaft(en)? , fressfeind(e|s|en|en)? , futtersuche(n)? , gebietsfremd([a-z])\* art(en)? , genetisch([a-z])\* ressource(n)? , genetisch([a-z])\* vielfalt , geschützt([a-z])\* art(en)? , geschützt([a-z])\* tier([a-z])\* , gewässerschutzzone(n)? , gewässerverschmutzung(en)? , gletschervorfeld(s|es|er|ern)? , grosspilz(e|es|en)? , grossraubtier([a-z])\* , grünbrücke(n)? , gvo , heidemoor([a-z])\* , hochmoor([a-z])\* , hochstamm([a-z])\* , insektensterben(s)? , invasiv([a-z])\* art(en)? , jagdbanngebiet(e|en|es|s)? , jungpflanze(n)? , kieselalge(n)? , kulturlandschaftsbeitr(ag(es|s)?|äge(n)?)? , landschaftszerschneidung(en)? , laubb(a|ä)um([a-z])\* , lebe(n)sraum([a-z])\* |nsräume(n)? , leitart(en)? , lichte(r|n)? w(a|ä)ld(er|es|s)? , luchs(e|es|en)? , magerwiese(n)? , makrophyt(en)? , makrozoobenthos , mhb , mikrophyt(en)? , mikroverunreinigung(en)? , mischw(a|ä)ld(er|es|s)? , monokultur(en)? , moorlandschaft(en)? , moorschutz(es)? , moorw(a|ä)ld(er|es|s)? , nadelb(a|ä)um([a-z])\* , nagoya(-protokoll(s)?)? , nährstoffbelastung(en)? , nasswiese(n)? , nawa , neobiont(en|a)? , neobiotisch([a-z])\* , neophyt(en)? , neozo(on(s)?|en) , nistpl(a|ä)tz([a-z])\* , nitrat(e|s)? , nitrit(e|s)? , normallandschaft(en)? , nützling([a-z])\* , oberflächengewässerqualität(en)? , ökobeitr(ag|äge)(s|n)? , ökologisch([a-z])\* aufwertung(en)? , ökologisch([a-z])\* ausgleich([a-z])\* , ökologisch([a-z])\* infrastruktur([a-z])\* , ökologisch([a-z])\* leistungsnachweis(e|es)? , ökologisch([a-z])\* wertvoll , ökosystem([a-z])\* , ösl(-check)? , pelagial(s)? , phosphat([a-z])\* , populationsdynamik(en)? , prioritär([a-z])\* art(en)? , pufferstreifen(s)? , restwasser([a-z])\* , röhricht(e|s)? , rot([a-z])\* liste([a-z])\* , rudel(s|n)? , schädling([a-z])? , spezi(es|en) , steinhaufen(s)? , tiergenetisch([a-z])\* , tot([a-z])\* fisch([a-z])\* , totholz([a-z])\* , trockenwiese(n)? , tww , über(düngung([a-z])\*|fisch([a-z])\* , übergangsmoor([a-z])\* , uferwiese(n)? , unterh(olz(es)?|ölzer) , verbuschung([a-z])\* , vernetzungs(beitrag(es|s)?|beiträge(n)?) , vernetzungsfläche(n)? , vernetzungsgebiet([a-z])\* , vernetzungsprojekt([a-z])\* , w(o|ö)lf(e|es|en)? , wald(rand(es|s)?|ränder(n)?) , waldlichtung(en)? , waldmanagement(s)? , wasserpflanze(n) ? , wbs , wild(bestand(es|s)?|bestände(n)?) , wildkr(a|ä)ut([a-z])\* , wildleben([a-z])\* , wildtier([a-z])\* , wildwechsel([a-z])\*

**French:** (?<lins(.){1,2})truite(s)?( de lac| de rivière) , (?<!saut(s)?.de.)loup(s)? , (aire|espace|zone)(s)? (naturelle(s)? , (conservation|protection|maintien) (de la|des) (flore(s)?|faune(s)? , (flore(s)?|faune(s)? (riche(s)?|diversifiée(s)?) , (flore(s)?|faune(s)? sauvage , (flore(s)?|faune(s)?|espèce(s)?) menacées , (harde(s)?|bande(s)?) de loups , (insecte(s)?|anim([a-z])|plante(s)?) nuisible(s)? , (intensité|degré) (de l.|d.|des)? exploitation(s)?( agricole)? , (lieu(x)?|site(s)?) de nidification , (pont(s)?|passerelle(s)?|passage(s)?) à faune (en bois)? , (protocole) ?(de )?nagoya , (restauration de la )?migration des poissons , abeille(s)? (sauvage(s)?|mellifère(s)?) , aire(s)? de mise en réseau , alevinage(s)? , all-ema , ambrosie(s)? , amphibi([a-z])\* , anima([a-z])\* protég([a-z])\* , apport de nutriments , azotate , azotite , bande(s) tampon , batracien(s)? , biodiversité , biotope(s) ,

bois mort, bois usagé, boisés primaires, bordure(s) tampon, bostryche(s) ?, castor(s) ?, champignon(s) ? supérieur(s) ?, chauve(s) ?-souris, chauvesouris, chiroptères, coléoptère(s) ?, collision(s) ? des oiseaux, communauté (des |d.) espèces, compensation(s) ? écologique(s) ?, conservation (de la |des) forêt(s) ?, conservation (des |d. |d.une) espèce(s) ?, contribution(s) ? au paysage cultivé, contribution(s) ? écologique(s) ?, contribution(s) ? pour la mise en réseau, contributions à la biodiversité, convention de berne(! pour la protection des (oe|œ)uvres littéraires), convention sur la diversité biologique, corridor(s) ? (faunique | biologique), corridor(s) ? à faune, déclin (des |d. |d.une) espèce(s) ?, diatomée(s) ?, diminution(s) ? (de la |des) population(s) ?, disparition des insectes, district(s) ? franc(s) ?( fédér([a-z])\* ) ?, diversité biologique, diversité des espèces, diversité génétique, dynamique de(s) ? population(s) ?, eau(x) ? peu profonde(s) ?, échange(s) ? faunistique(s) ?, écoduc(s) ?, écosystème(s) ?, élargissement(s) ? de rivière(s) ?, embuissonnement(s) ?, empoisonnement(s) ?, escarbot(s) ?, espèce(s) ? (exotique(s) ?|exogène(s) ?), espèce(s) ? (rare(s) ?|sensible(s) ?) ( de la faune) ?, espèce(s) ? caractéristique(s) ?, espèce(s) ? cible(s) ?, espèce(s) ? endémique(s) ?, espèce(s) ? et milieux agricoles, espèce(s) ?( de faune | de flore | anim([a-z])\* | végétale(s) ?) ? prioritaire(s) ?, espèce(s) ?( de faune | de flore | anim([a-z])\* | végétale(s) ?) ? protégée(s) ?, espèce(s) ?( exotique(s) ?| exogène(s) ?) ? envahissante(s) ?, étalement urbain, eutrophisation(s) ?, extinction (des |d. |d.une) espèce(s) ?, faune(s) ? aquatique(s) ?, faune(s) ? piscicole(s) ?, fertilité du sol, feuillu(s) ?, flore(s) ? aquatique(s) ?, forêt riveraine(s) ?, forêt(s) vierge(s) ?, forêt(s) ? alluviale(s) ?, forêt(s) ? claire(s) ?, forêt(s) ? mixte(s) ?, forêt(s) ? riparienne(s) ?, gestion forestière, grand tétras, grand(s) ? prédateur(s) ?, grande(s) ? roselière(s) ?, herbe(s) ? sauvage(s) ?, iae, indicateur(s) ? agro.environmenta([a-z])\* , infrastructure écologique, jeune(s) ? plant(e |s |es) ?, lande(s) ? de haut(s) ? marais, lièvre(s) d.europe(s) ?, lièvre(s) ? brun(s) ?, liste(s) ? rouge(s) ?, lynx, macroinvertébré(s) ? benthique(s) ?, macrophyte(s) ?, marais à grande(s) ? laiche(s) ?, marais de transition, marge(s) ? glaciaire(s) ?, mbd, microphyte(s) ?, micropolluant(s) ?, migration (de la |des) faune(s) ?, milieu(x) ? naturel(s) ?, mitage du paysage, monir, monoculture(s) ?, morcellement(s) ?( du | des) ? paysage(s), mortalité piscicole aiguë, nawa, néobiont(s) ?, néobiotique(s) ?, néozoaire(s) ?, nitrate, nitrite, oiseau(x) ? nicheur(s) ?, organisme(s) ? auxiliaire(s) ?, organisme(s) ? protégé(s) ?, ours brun(s) ?, passage(s) ? à gibier, passe(s) ? à poissons, paysage fluvial, paysage ordinaire, pélagos, perte (des |d. |d.une) espèce(s) ?, plant(s) ? aquatique(s) ?, plante(s) ? ligneuse(s) ?, pollinisa([a-z])\* , pollution(s) ? aquatique(s) ?, prairie et pâturages secs, prairie(s) ? humide(s) ?, prairie(s) ? maigre(s) ?, prairie(s) ? riveraine(s) ?( d.un cours d.eau) ?, prairie(s) ? sec(s) ?, projet(s) ? de mise en réseau, protection (des |d. |d.une) espèce(s) ?, protection des marais, qualité des eaux de surface, recherche(s) ? de nourriture, rempoissonnement(s) ?, repeuplement(s) ?( piscicole(s) ?) ?, réserve(s) ? de faune, réserve(s) ? forestière(s) ?, réserve(s) ? naturelle(s), réserve(s) ? naturelle(s) forestière(s) ?, réserve(s) ? naturelle(s) spéciale(s) ?, réservoir(s) ? (de la |des) (flore(s) ?|faune(s) ?), résineux, ressources génétiques, restauration(s) ? naturelle, revitalis([a-z])\* (de la |des) rive(s) ?, richesse des espèces, ripisylve(s) ?, scarabée(s) ?, scolyte(s) ?, secteur(s) ? sensible de protection des eaux, service(s) écosystémique(s), sites marécageu, surface(s) ? mises en réseau, surfertilis([a-z])\* , surpêche([a-z])\* , tas de branche(s) ?, tas de pierre(s) ?, tourbière(s) ?, utilisation intensive (des terres |du sol | (de la |des) forêt(s) ?), valeur écologique, valeur(s) ? biologique(s) ?, valorisations(s) ? écologique(s) ?, végétation de(s) (zone(s) ?|plaine(s) ?) alluviale(s) ?, végétation de(s) ? rive(s) ?, végétation(s) ? aquatique(s) ?, végétation(s) ? riveraine(s) ?, zone(s) ? alluviale(s) ?, zone(s) ? de protection biologique(s) ?, zone(s) ? pélagique(s) ?, zone(s) ? riparienne(s) ?, zoogénétique(s) ?

**Italian:** (domini(o) ? | distrett(o |i) |zon(a |e)) pelagic(o |a), (insett(o |i) )?impollinator(e |i), (organism(o |i) | animal(e |i) |pian(a |e)) nociv(a |o |e |i), (popolazione |stato) della fauna selvatica, (protocollo di )?nagoya, (sparizione |estinzione |moria) di insetti, acqua stagnante, aghifogli(a |e), all-ema, allargament(o |i) (distint(o |i) | dell.alveo |della sezione )?del fiume, allocton(a |o |e |i), alto fusto protett(i |o), ambient(e |i) fluvial(e |i), ambient(e |i) golenal(e |i), ambient(e |i) vital(e |i), ambrosi(a |e), amfibi([a-z])?, animal(e |i) protett(o |i), animal(e |i) selvatic(o |i), ap(e |i) (selvatic(a |he) |mellifer(a |e)), avanzamento (del |dei) bosc(o |hi), bandit(a |e) di caccia( federal(e |i) )?, biodiversità, biotop(o |i), bosc(o |hi) protett(o |i), bosco fitto, bosco misto, branc(o |hi) (di |del) lup(o |i), carico di nutrienti, castor(o |i), chiroptera, chiotter(o |i), coleotter(o |i), collision(e |i) (di |degli)

uccelli, compensazion(e|i) ecologic(a|he), composizione dell(a|e) specie, concimazion(e|i) eccessiv(a|e),  
 conifer(a|e), conservazione del bosc(o|hi), contribut(o|i) per il paesaggio rurale, contribut(o|i) per  
 l.interconnessione, contribut(o|i) per la biodiversità, convenzione di berna, convenzione sulla biodiversità,  
 copertura del suolo, corridoi(o)? faunistic(o|i), cumul(o|i) di (pietr(a|i)|sassi|massi), cumul(o|i) di legn(o|a|i),  
 declino dell(a|e) specie, defluss(o|i) discontinu(o|i), defluss(o|i) minim(o|i), defluss(o|i) residual(e|i),  
 diatome(a|e), dinamic(a|he) della popolazione, diversità biologica, diversità dell(a|e) specie, diversità  
 genetic(a|he), ecosistema, erb(a|e) selvatic(a|he), estinzione dell(a|e) specie, eutrofizzazione(e|i), fauna,  
 fertilità del suolo, flora, foresta fitta, foresta mista, fosfat(o|i), frammentazion(e|i) del paesaggio, frondier(a|e),  
 frutteti tradizionali alberi da frutto, gestion(e|i) forestal(e|i), giovan(e|i) piant(a|e), grado (di |d.)utilizzo, grado  
 di sfruttamento, grand(d|i) predator(e|i), habitat, iaa, imboschiment(o|i), imboschimento, impollinazione,  
 incespugliament(o|i), indicator(e|i) agro.ambiental(e|i), infrastruttur(a|e) ecologic(a|he), ingegneria genetica,  
 inquinamento idrico, intensità (di |d.)utilizzo, intensità di sfruttamento, land(a|e) paludos(a|e), latifogli(a|e),  
 legn(o|a|i) mort(o|a|i), lepr(e|i) comun(e|i), lepr(e|i)( brun(a|e))? europe(a|e), linc(e|i), list(a|e) ross(a|e),  
 lup(o|i|etti)(?! perde il pelo ma non il vizio), macrofit(a|e), macromicet(o|i), macrozoobenthos, margine  
 proglaciale, mbd, microfit(a|e), microinquinant(e|i), migrazion(e|i) di pesc(e|i), monitoraggio della  
 biodiversità, monoc(u|o)ltur(a|e), moria (di|dei) pesc(e|i), moria di pesc(e|i), mortalità (di|dei) pesc(e|i),  
 mucchi(o)? di (pietr(a|i)|sassi|massi), mucchi(o)? di legn(o|a|i), munid, nawa, neobiotic(o|a|i|he), neozo(i|e),  
 nitrit(o|i), ogm, organism(o|i) ausiliari(o)?, organism(o|i) geneticamente modificat(o|i), organism(o|i)  
 transgenic(o|i), organism(o|i) util(e|i), organism(o|i) vivent(e|i), ors(o|i) brun(o|i), paesaggi(o)? cultural(e|i)  
 tradizional(e|i), paesaggi(o)? fluvial(e|i), paesaggio normale, paesaggio ordinario, palud(e|i) a grandi carichi,  
 palud(e|i) a piccole carichi, palud(e|i) bass(a|e), palud(e|i) torbier(a|e) di transizione, parassit(a|i), pascol(o|i)  
 secc(o|i), passaggi(o)? degli animali selvatici, passaggi(o)? faunistic(o|i), passaggi(o)? per pesc(e|i), perdit(a|e)  
 di specie, perdità dell(a|e) specie, pesc(e|i) mort(o|i), pesca eccessiva, piant(a|e) aquatic(a|he), piant(a|e)  
 selvatic(a|he), pipistrell(o|i), pont(e|i) faunistic(o|i), popolamento di selvaggina, popolazion(e|i) selvatic(a|  
 he), prat(o|i) e pascol(o|i) secch(o|i), prat(o|i) magr(o|i), prat(o|i) rivierasca(o|hi), prat(o|i) secc(o|hi), prat(o|  
 i) umid(o|i), predator(e|i), progett(o|i) d.interconnessione, progett(o|i) di interconnessione, protezion(e|i)  
 delle (paludi|torbiere alte|torbiere di transizione|torbiere basse), protezione (di|degli) uccelli, protezione e  
 (della)? depurazione delle acque, prova che le esigenze ecologiche sono rispettate, qualità delle acque  
 superficiali, r(e|i)vitalizzazion(e|i), ricerca (di|del) cibo, rimimboschiment(o|i), rinaturazion(e|i),  
 rinaturazion(e|i) (del fiume|dei fiumi), ripopolament(o|i) pescicolo, riserv(a|e) forestal(e|i), riserv(a|e)  
 natural(e|i), riserv(a|e) protett(e|i), risors(a|e) genetic(a|he), rivalutazione ecologica, scambi(o)? faunistic(o|i),  
 scolitid(e|i), servizi(o)? ecosistemic(o|i), settor(e|i) di protezione delle acque, sit(o|i) di nidificazione,  
 sottobosco, sovraconcimazione, sovrapesca, spb, specie allocton(a|e), specie bersaglio, specie e habitat (in  
 agricoltura|agricol(e|i)), specie endemic(a|he), specie esotic(a|he), specie faro, specie invasiv(a|e), specie  
 prioritari(a|e), specie protett(a|e), superfici(e)? interconness(a|e), torbier(a|e) alt(a|e), transgenetica, trot(a|  
 e)( di lago| di fiume)?, uccello(o|i) nidificant(e|i), valore ecologico, vegetazion(e|i) legnos(a|e), vegetazione di  
 golena, vegetazione riparia, vegetazione rivierasca, zon(a|e) alluvional(e|i), zon(a|e) di protezione delle acque  
 sotterranee)?, zon(a|e) epipelagic(a|he), zon(a|e) golenal(e|i), zon(a|e) palustr(e|i), zon(a|e) tampone,  
 zoogenetic(a|he|o|i)

## Online Appendix A5: Structural topic model

List of topic labels (sub-issues) and topic top words (highest probability).

| Label                          | Top words                                                                                                                                      |
|--------------------------------|------------------------------------------------------------------------------------------------------------------------------------------------|
| Agriculture subsidies          | fruchtfolge, waldweiden, beitrag, landbau, einkommen, agrarpolitik, getreide, ökologisch, raufutter, hof                                       |
| Aquatic habitats protection    | gefangenschaft, sterben, initiative, uvp, tonne, denken, wahr, bescheiden, extrem, abgabe                                                      |
| Aquatic habitats protection    | stein, foen, fisch, werk, meter, wasser, krebs, künstliche, kraftwerk, see                                                                     |
| Aquatic restoration            | grundwassers, kanal, volksinitiative, wasserqualität, grundwasser, renaturierung, wasserkraftwerke, kilowattstunde, hochwasserschutz, gewässer |
| Biodiversity policy            | zersiedelung, siebenthal, klimawandel, umweltpolitik, investition, attraktivität, gebietsfremden, oecd, klima, strategie                       |
| Construction projects          | aufforstung, bundesinventars, bundesgerichts, aue, grundstück, biotop, kantonalen, bundesgericht, strasse, verwaltungsgericht                  |
| Costs                          | doubs, finanzierung, franke, aufstockung, budget, million, passieren, prozent, betrag, investieren                                             |
| Ecosystem services             | rasse, parasit, vielfalt, umweltbelastungen, klimapolitik, biologische, akzeptabel, stoppen, versauerung, organisch                            |
| Genetic resources              | kuala, nagoya, biotechnologie, pathogene, nutzer, protokolls, traditionell, protokoll, aufteilung, gerecht                                     |
| Genetically modified organisms | pollenflug, kontaminieren, vorsorgeprinzip, medikament, kulturpflanzen, pflanzlich, gentechnik, vermarktung, züchten, landwirtschaft           |
| Genetically modified organisms | forscher, importieren, vermarkten, verwendung, sorte, verbraucher, stimme, kommerziell, antibiotika, organismus                                |
| Int. treaties / foreign policy | wasserressourcen, palmöl, menschenrechte, china, bevölkerungsgruppen, arm, indonesien, reform, nation, multilaterale                           |
| Int. treaties / foreign policy | cites, genfer, ausschuss, handel, freilebend, illegale, eutrophierung, staat, ozon, europäisch                                                 |
| Pesticides                     | hecke, weinbau, behandlung, pflanzenschutzmitteln, stamm, test, obstbau, pflanze, hummeln, abends                                              |
| Protected areas                | bundesinventar, inventar, stätte, objekt, grünfläche, auengebiete, abgrenzung, schönheit, nr., enteignung                                      |
| Protected areas                | ufer, bau, wald, breiten, naturschutzgebieten, landschaftlich, süd, waldfunktionen, rodung, waldflächen                                        |
| Protected areas                | denkmal, kunst, karte, lästig, lärmschutz, lärm, lebensgemeinschaften, strahlung, flughafen, seltene                                           |
| Wildlife                       | säugetier, exemplar, geschützt, fangen, vogel, wildtieren, bedrohen, besuchen, bär, überraschen                                                |
| Wildlife                       | herde, engler, fournier, wolfspopulation, rudel, wolfes, hirte, angreifen, kündigen, wolf                                                      |
| Wildlife                       | jagen, raubtier, jagdgesetzes, jagd, luchse, hirsch, population, gämsen, jagdverordnung, regulierung                                           |
